# Supplementary material
Source: PubMed Central journal article supplement (PMC6015531)

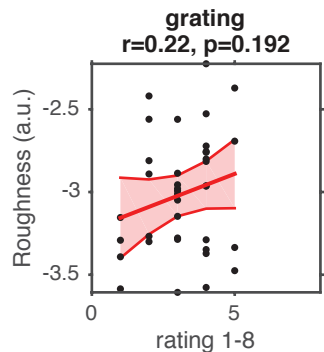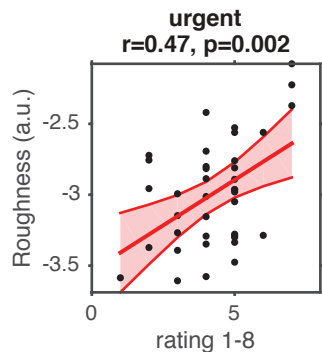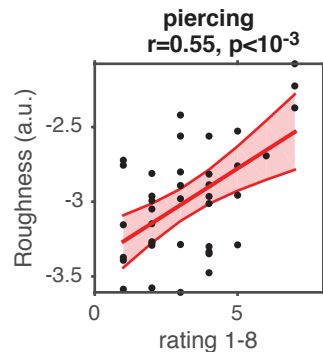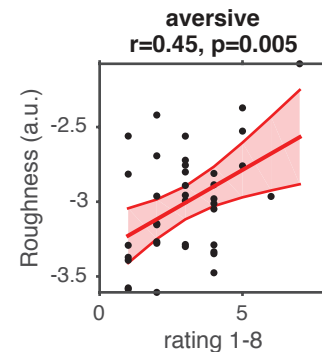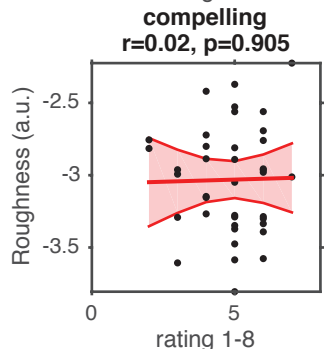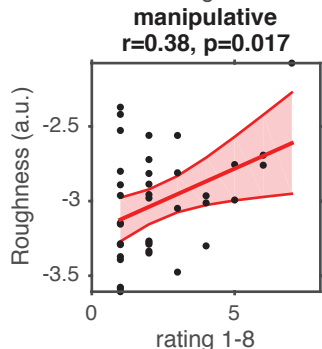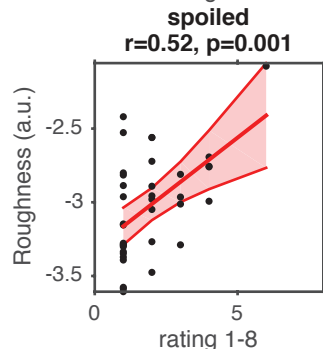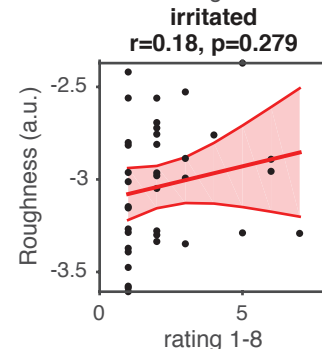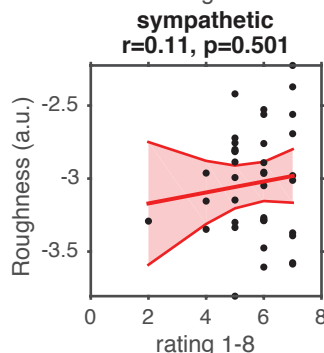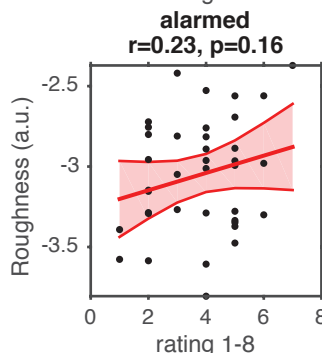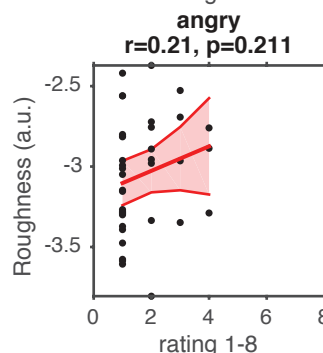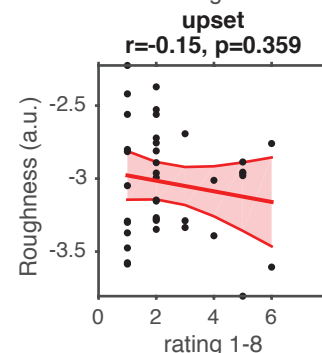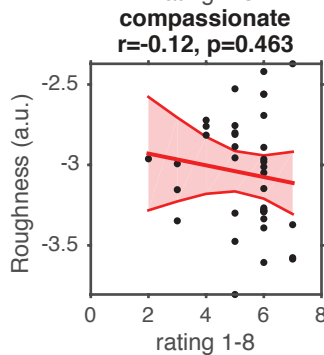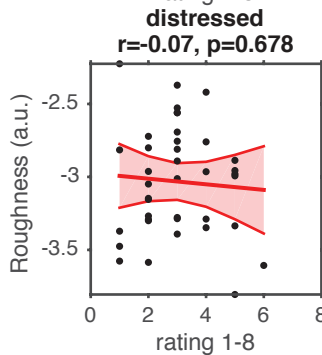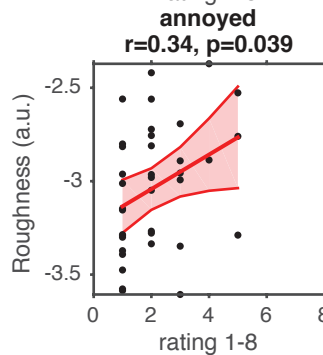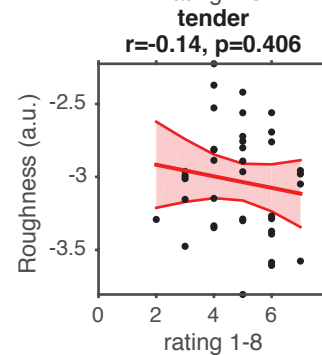

Supplement: NIHMS933619-supplement.pdf [file NIHMS933619-supplement.pdf]
